# Supplementary material for: Hydroformylation by Pt–Sn compounds from N-heterocyclic stannylenes
Source: Royal Society of Chemistry journal article supplement (doi:10.1039/c2dt30988b), 2012-01-01
Supplement: c2dt30988b.pdf [file c2dt30988b.pdf]

Supplementary Material for:

## Hydroformylation by Pt-Sn compounds from *N*-heterocyclic stannylenes

Benjamin M. Day,<sup>a</sup> Philip W. Dyer,<sup>b</sup> and Martyn P. Coles\*<sup>c</sup>

<sup>a</sup> Department of Chemistry, University of Sussex, Falmer, Brighton BN1 9QJ, UK

<sup>b</sup> Centre for Sustainable Process Chemistry, Department of Chemistry, Durham University, South Road, Durham DH1 3LE, UK

<sup>c</sup> School of Chemical and Physical Sciences, Victoria University of Wellington, PO Box 600, Wellington 6140, New Zealand. Fax: +64 (0)4 463 5241; Tel: +64 (0)4 463 6357; E-mail: martyn.coles@vuw.ac.nz

---

### PtCl(SnCl{Me<sub>2</sub>Si(NAr)<sub>2</sub>})(PPh<sub>3</sub>)<sub>2</sub> (**2a**)

*Preparative Scale:* A solution of [Me<sub>2</sub>Si{NAr}<sub>2</sub>]Sn (**1**) (158 mg, 0.30 mmol) in toluene was added drop wise to a suspension of PtCl<sub>2</sub>(PPh<sub>3</sub>)<sub>2</sub> (240 mg, 0.30 mmol) in toluene. The solution went clear and orange after complete addition and stirring for 10 min. The reaction mixture was stirred for a further 18 h. The solution was concentrated, filtered and stored at -20 °C, affording orange crystals of **2a**. Yield = 256 g (67 %). Note, these crystals readily desolvate under vacuum to give a yellow powder.

*NMR Scale:* A yellow solution of [Me<sub>2</sub>Si{NAr}<sub>2</sub>]Sn (**1**) (30.4 mg, 0.06 mmol, 2 equiv.) in C<sub>6</sub>D<sub>6</sub> was added to a NMR tube fitted with a J. Youngs tap that had previously been charged with PtCl<sub>2</sub>(PPh<sub>3</sub>)<sub>2</sub> (22.8 mg, 0.03 mmol). A clear orange solution formed. NMR spectra were consistent with PtCl{(Me<sub>2</sub>Si{NAr}<sub>2</sub>SnCl)}(PPh<sub>3</sub>)<sub>2</sub> (**2a**), with signals present for one equivalent of unreacted **1**.

Anal. Calcd. For C<sub>62</sub>H<sub>70</sub>Cl<sub>2</sub>N<sub>2</sub>P<sub>2</sub>PtSiSn (1317.96): C 56.50, H 5.35, N 2.13 %. Found: C 56.62, H 5.26, N 2.05 %. <sup>1</sup>H NMR (C<sub>6</sub>D<sub>6</sub>, 400 MHz): δ 7.42 (m, 6H, *o*-PPh<sub>3</sub>), 7.36 (d, 4H, *m*-C<sub>6</sub>H<sub>3</sub>), 7.28 (m, 6H, *o*-PPh<sub>3</sub>), 7.21 (t, 2H, *p*-C<sub>6</sub>H<sub>3</sub>), 6.93-6.74 (m, 12H, *m*-PPh<sub>3</sub>), 6.51 (m, 6H, *p*-PPh<sub>3</sub>), 5.05 (br, 2H, CHMe<sub>2</sub>), 4.64 (br, 2H, CHMe<sub>2</sub>), 1.81-1.21 (br, 24H, CHMe<sub>2</sub>), 0.66 (s, 3H, SiMe<sub>2</sub>), 0.43 (s, 3H, SiMe<sub>2</sub>). <sup>13</sup>C{<sup>1</sup>H} NMR (C<sub>6</sub>D<sub>6</sub>, 100 MHz): δ 149.0, 143.7, 135.0, 133.0, 131.1, 130.9, 129.5, 128.1, 123.9, 123.3 (C<sub>6</sub>H<sub>3</sub> and PPh<sub>3</sub>), 27.4 (CHMe<sub>2</sub>), 26.6 (br, CHMe<sub>2</sub>), 5.0, 4.2 (SiMe<sub>2</sub>). <sup>31</sup>P{<sup>1</sup>H} NMR (C<sub>6</sub>D<sub>6</sub>, 162 MHz): δ 31.7 (d, <sup>2</sup>J<sub>PP</sub> = 15 Hz, <sup>2</sup>J<sub>119SnP</sub> = 3522 Hz, <sup>2</sup>J<sub>117SnP</sub> = 3367 Hz, <sup>1</sup>J<sub>PtP</sub> = 2597 Hz), 19.9 (d, <sup>2</sup>J<sub>PP</sub> = 15 Hz, <sup>2</sup>J<sub>119SnP</sub> = 136 Hz, <sup>1</sup>J<sub>PtP</sub> = 3886 Hz). <sup>119</sup>Sn{<sup>1</sup>H} NMR (C<sub>6</sub>D<sub>6</sub>, 149 MHz): δ -167 (dd, <sup>2</sup>J<sub>SnP</sub> = 139 Hz, <sup>2</sup>J<sub>SnP</sub> = 3523 Hz, <sup>1</sup>J<sub>SnPt</sub> = 15436 Hz). <sup>195</sup>Pt{<sup>1</sup>H} NMR (C<sub>6</sub>D<sub>6</sub>, 85 MHz): δ -4695 (dd, <sup>1</sup>J<sub>PtP</sub> = 2596 Hz, <sup>1</sup>J<sub>PtP</sub> = 3884 Hz).

### **PtCl(SnCl{Me<sub>2</sub>Si(NAr)<sub>2</sub>})(COD) (2b)**

*NMR Scale:* Compound **2b** was prepared as for **2a**, using [Me<sub>2</sub>Si{NAr}<sub>2</sub>]<sub>2</sub>Sn (**1**) (19.3 mg, 0.037 mmol) and PtCl<sub>2</sub>(COD) (13.7 mg, 0.037 mmol). NMR spectra were consistent with PtCl(Me<sub>2</sub>Si(NAr)<sub>2</sub>SnCl)(COD) (**2b**).

<sup>1</sup>H NMR (C<sub>6</sub>D<sub>6</sub>, 400 MHz): δ 7.25 (d, <sup>3</sup>J<sub>HH</sub> = 7.1 Hz, 4H, *m*-C<sub>6</sub>H<sub>3</sub>), 7.12 (t, <sup>3</sup>J<sub>HH</sub> = 7.1 Hz, 2H, *p*-C<sub>6</sub>H<sub>3</sub>), 5.28 (br s, <sup>2</sup>J<sub>PtH</sub> = 37.0 Hz, 2H, COD-CH), 4.85 (br s, <sup>2</sup>J<sub>PtH</sub> = 67.0 Hz, 2H, COD-CH), 4.65 (sept, 4H, <sup>3</sup>J<sub>HH</sub> = 6.7 Hz CHMe<sub>2</sub>), 1.56 (d, <sup>3</sup>J<sub>HH</sub> = 6.7 Hz 12H, CHMe<sub>2</sub>), 1.49 (d, <sup>3</sup>J<sub>HH</sub> = 6.7 Hz, 12H, CHMe<sub>2</sub>), 1.19 (m, 4H, COD-CH<sub>2</sub>), 0.99 (m, 4H, COD-CH<sub>2</sub>), 0.55 (s, 3H, SiMe<sub>2</sub>), 0.47 (s, 3H, SiMe<sub>2</sub>). <sup>13</sup>C{<sup>1</sup>H} NMR (C<sub>6</sub>D<sub>6</sub>, 100 MHz): δ 148.1, 141.7, 124.4, 124.1 (C<sub>6</sub>H<sub>3</sub>), 121.9 (COD-CH), 87.7 (COD-CH), 32.0, 27.6 (COD-CH<sub>2</sub>), 27.2 (CHMe<sub>2</sub>), 26.6 (br, CHMe<sub>2</sub>), 4.4, 4.0 (SiMe<sub>2</sub>). <sup>119</sup>Sn{<sup>1</sup>H} NMR (C<sub>6</sub>D<sub>6</sub>, 149 MHz): δ -221.7 (<sup>1</sup>J<sub>PtSn</sub> = 21576 Hz). <sup>195</sup>Pt{<sup>1</sup>H} NMR (C<sub>6</sub>D<sub>6</sub>, 85 MHz): δ -3669.3 (<sup>1</sup>J<sub>Pt117Sn</sub> = 20618 Hz, <sup>1</sup>J<sub>Pt119Sn</sub> = 21569 Hz).

### **[Pt(μ-Cl){(Me<sub>2</sub>Si{NAr}<sub>2</sub>)<sub>2</sub>SnCl}(PEt<sub>3</sub>)<sub>2</sub>]<sub>2</sub> (3)**

*NMR Scale:* Compound **3** was prepared as for **2a**, using [Me<sub>2</sub>Si{NAr}<sub>2</sub>]<sub>2</sub>Sn (**1**) (15.4 mg, 0.029 mmol) and [PtCl(μ-Cl)(PEt<sub>3</sub>)<sub>2</sub>]<sub>2</sub> (11.5 mg, 0.015 mmol). NMR spectra were consistent with [Pt(μ-Cl){(Me<sub>2</sub>Si{NAr}<sub>2</sub>)<sub>2</sub>SnCl}(PEt<sub>3</sub>)<sub>2</sub>]<sub>2</sub> (**3**).

<sup>1</sup>H NMR (C<sub>6</sub>D<sub>6</sub>, 400 MHz): δ 7.06 (d, <sup>3</sup>J<sub>HH</sub> = 7.5 Hz, 4H, *m*-C<sub>6</sub>H<sub>3</sub>), 6.97 (t, <sup>3</sup>J<sub>HH</sub> = 7.5 Hz, 2H, *p*-C<sub>6</sub>H<sub>3</sub>), 4.37 (br, 4H, CHMe<sub>2</sub>), 1.45 (br, 12H, CHMe<sub>2</sub>), 1.37 (d, <sup>3</sup>J<sub>HH</sub> = 6.2 Hz 12H, CHMe<sub>2</sub>), 1.11 (m, 6H, PCH<sub>2</sub>CH<sub>3</sub>), 0.73 (s, 3H, SiMe<sub>2</sub>), 0.65 (dt, 9H, <sup>3</sup>J<sub>HH</sub> = 7.5 Hz, <sup>3</sup>J<sub>HP</sub> = 18.0 Hz, PCH<sub>2</sub>CH<sub>3</sub>), 0.23 (s, 3H, SiMe<sub>2</sub>). <sup>31</sup>P{<sup>1</sup>H} NMR (C<sub>6</sub>D<sub>6</sub>, 162 MHz): δ 17.5 (s, <sup>2</sup>J<sub>PSn</sub> = 178 Hz, <sup>1</sup>J<sub>PPt</sub> = 3761 Hz). <sup>119</sup>Sn{<sup>1</sup>H} NMR (C<sub>6</sub>D<sub>6</sub>, 149 MHz): δ -402 (d, <sup>2</sup>J<sub>PSn</sub> = 180 Hz, <sup>1</sup>J<sub>SnPt</sub> = 26999 Hz). <sup>195</sup>Pt{<sup>1</sup>H} NMR (C<sub>6</sub>D<sub>6</sub>, 85 MHz): δ -4058 (d, <sup>1</sup>J<sub>PPt</sub> = 3742 Hz).

### **Pt[Me<sub>2</sub>Si{N(Ar)(SnCl<sub>2</sub>)<sub>2</sub>}]<sub>2</sub>[(Me<sub>2</sub>Si{NAr}<sub>2</sub>)<sub>2</sub>Sn]<sub>2</sub> (4)**

*NMR Scale:* Compound **4** was prepared as for **2a**, using [Me<sub>2</sub>Si{NAr}<sub>2</sub>]<sub>2</sub>Sn (**1**) (81.0 mg, 0.15 mmol, 4 equiv.) and PtCl<sub>2</sub> (10.0 mg, 0.038 mmol). The sample was heated at 60 °C for 3 days, during which time the product crystallized as red crystals.
